# Supplementary material for: Size Effect of Gold Nanoparticles in Catalytic Reduction of p-Nitrophenol with NaBH4
Source: PubMed Central journal article supplement (PMC6269978; doi:10.3390/molecules181012609), 2013-10-11

## Supplementary Materials

**Figure S1.** TEM image and particle size distribution of Au NPs ( $1.7 \pm 0.3$  nm).

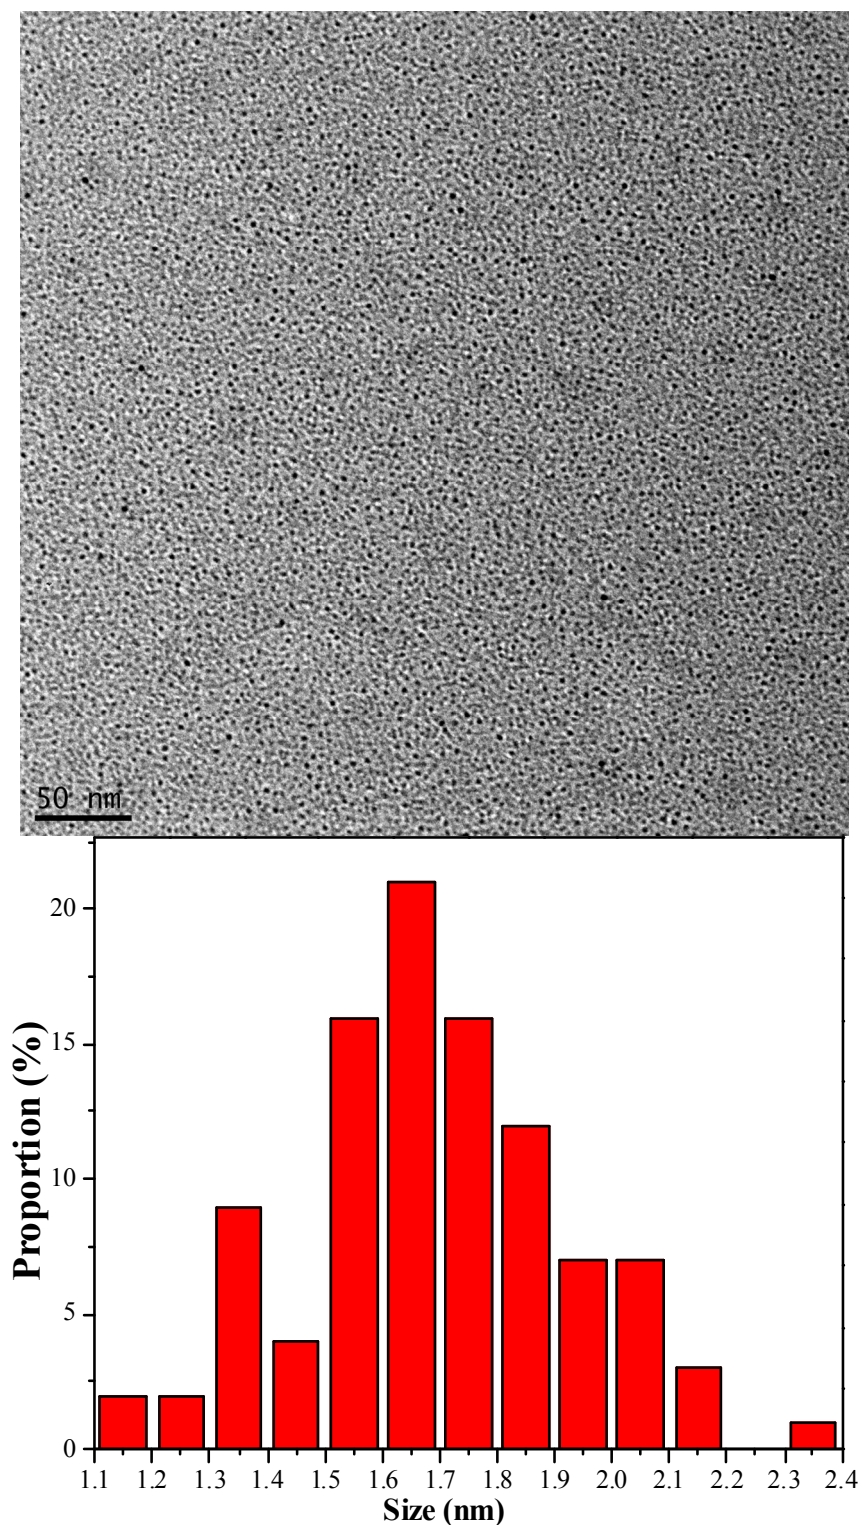

**Figure S2.** TEM image and particle size distribution of Au NPs ( $3.4 \pm 0.7$  nm).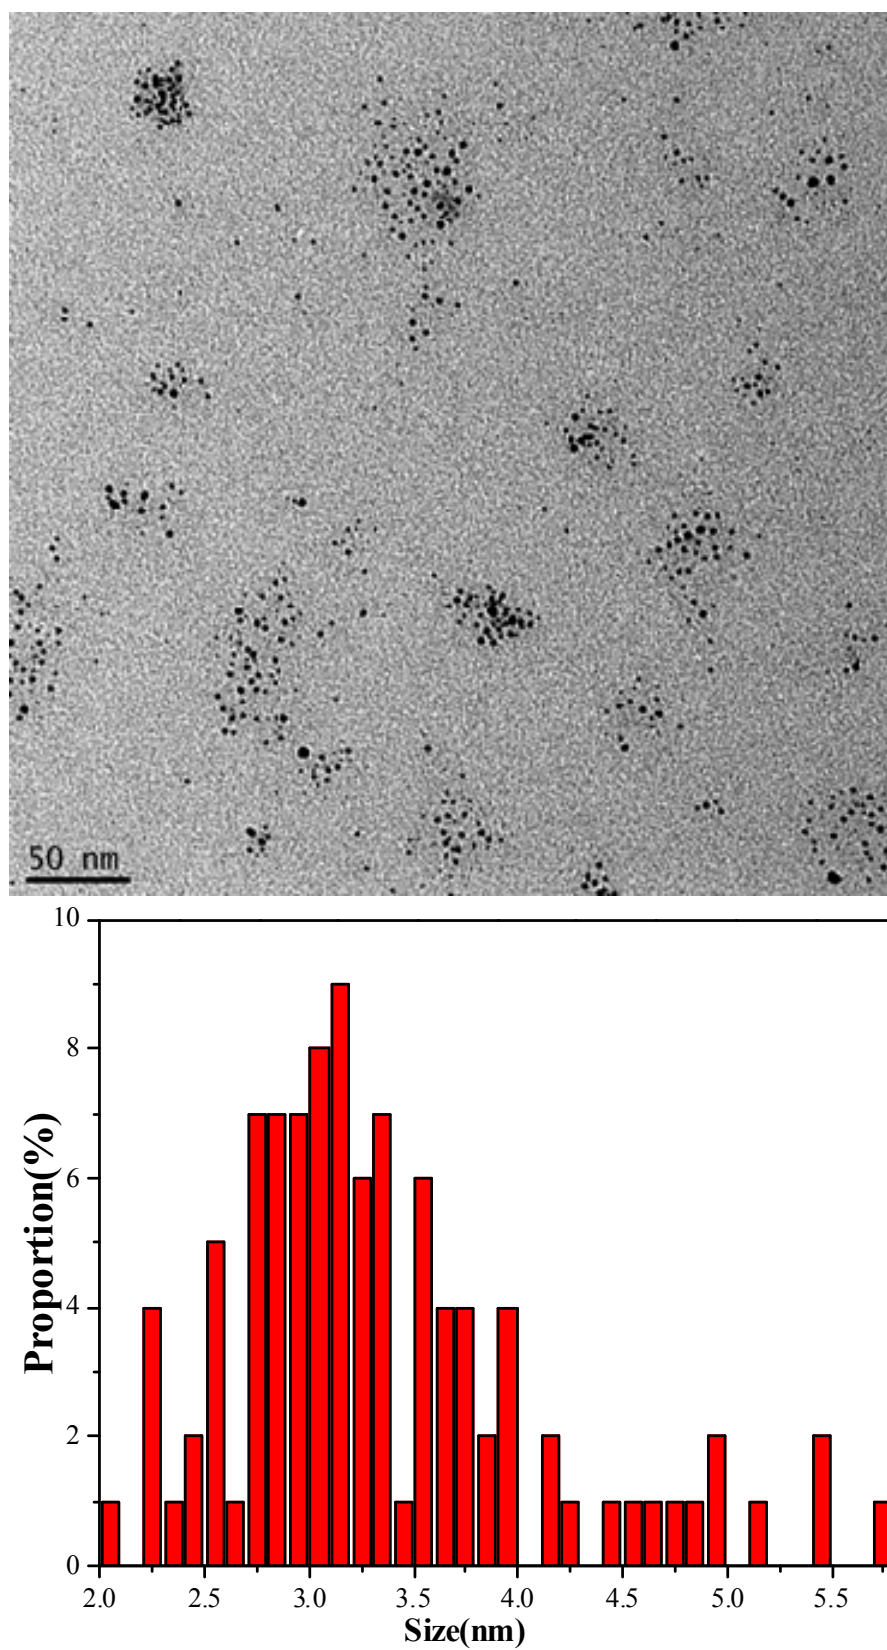

**Figure S3.** TEM image and particle size distribution of Au NPs ( $5.7 \pm 0.7$  nm).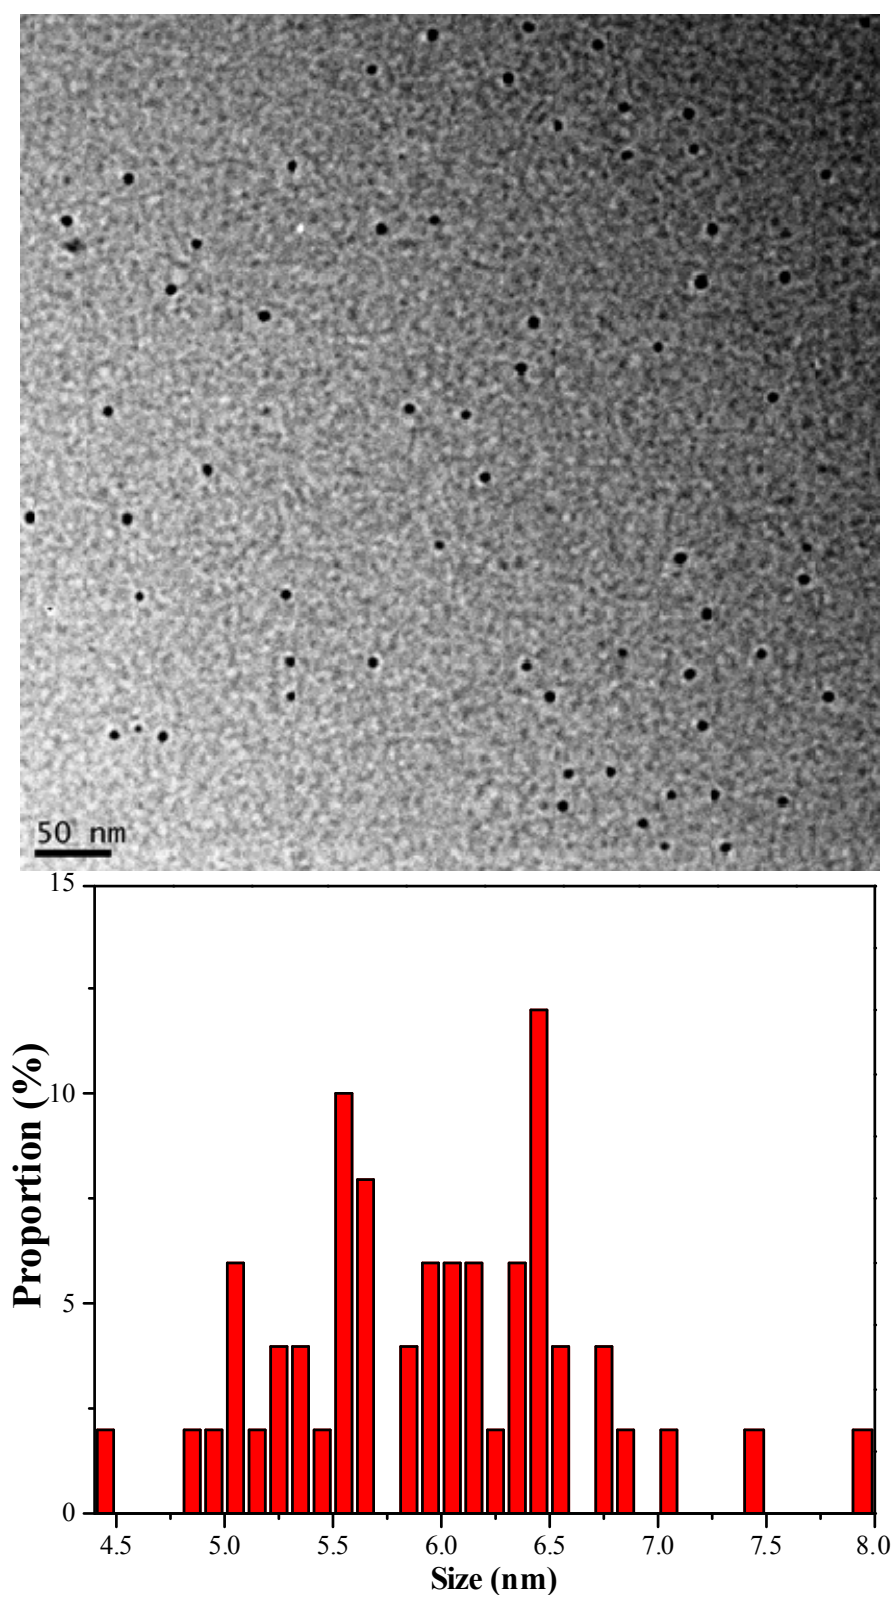



**Figure S4.** TEM image and particle size distribution of Au NPs (batch #1:  $8.2 \pm 1.0$  nm).

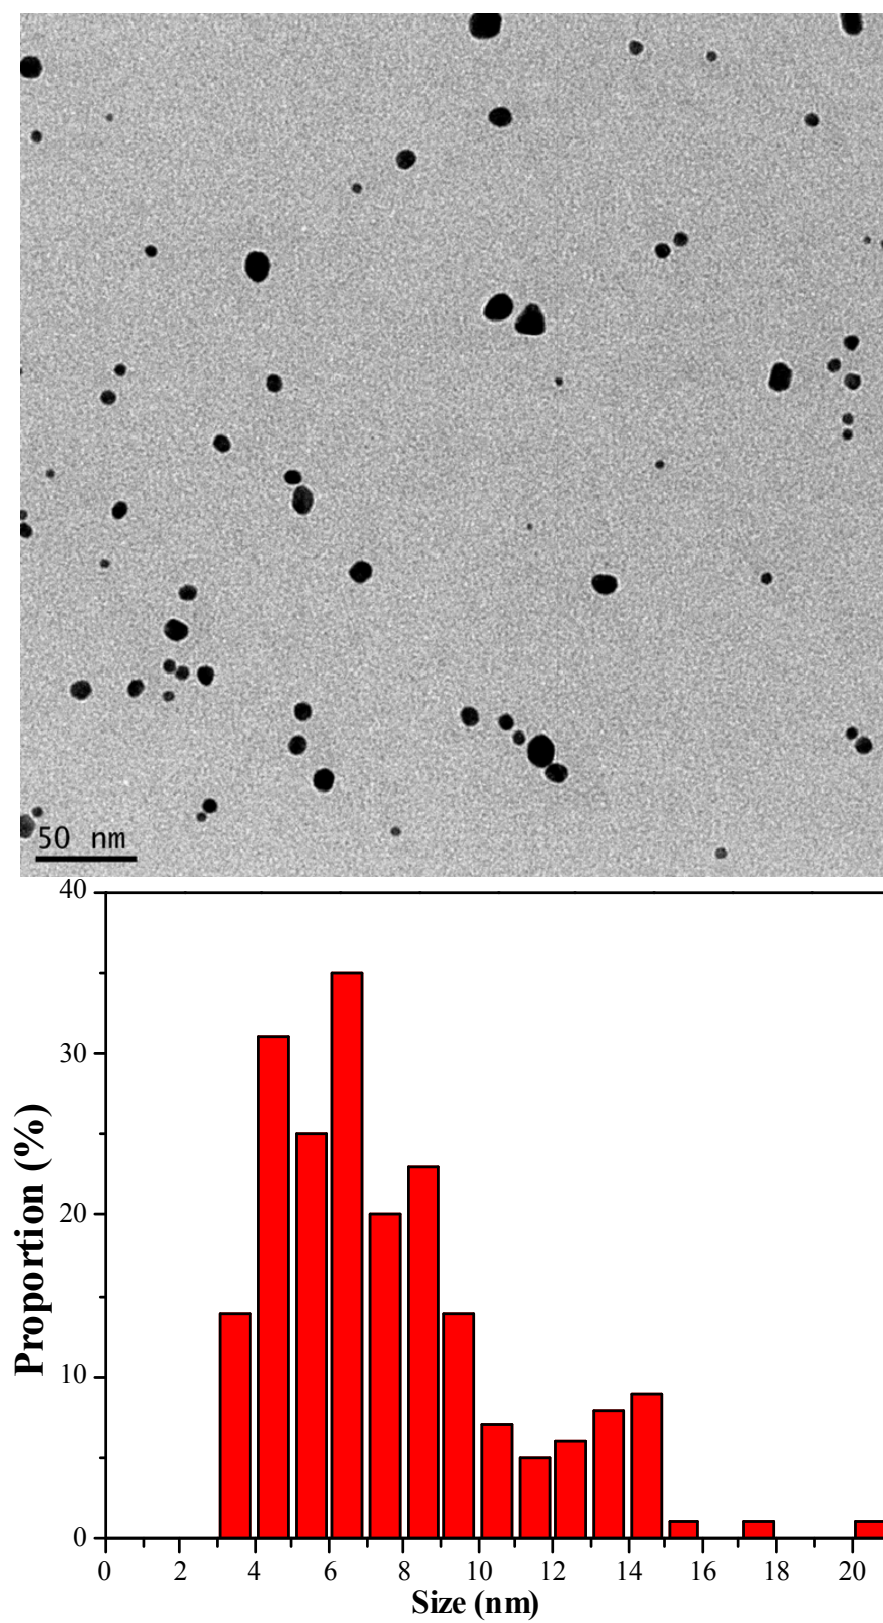

**Figure S5.** TEM image and particle size distribution of Au NPs (batch #2:  $7.5 \pm 1.8$  nm).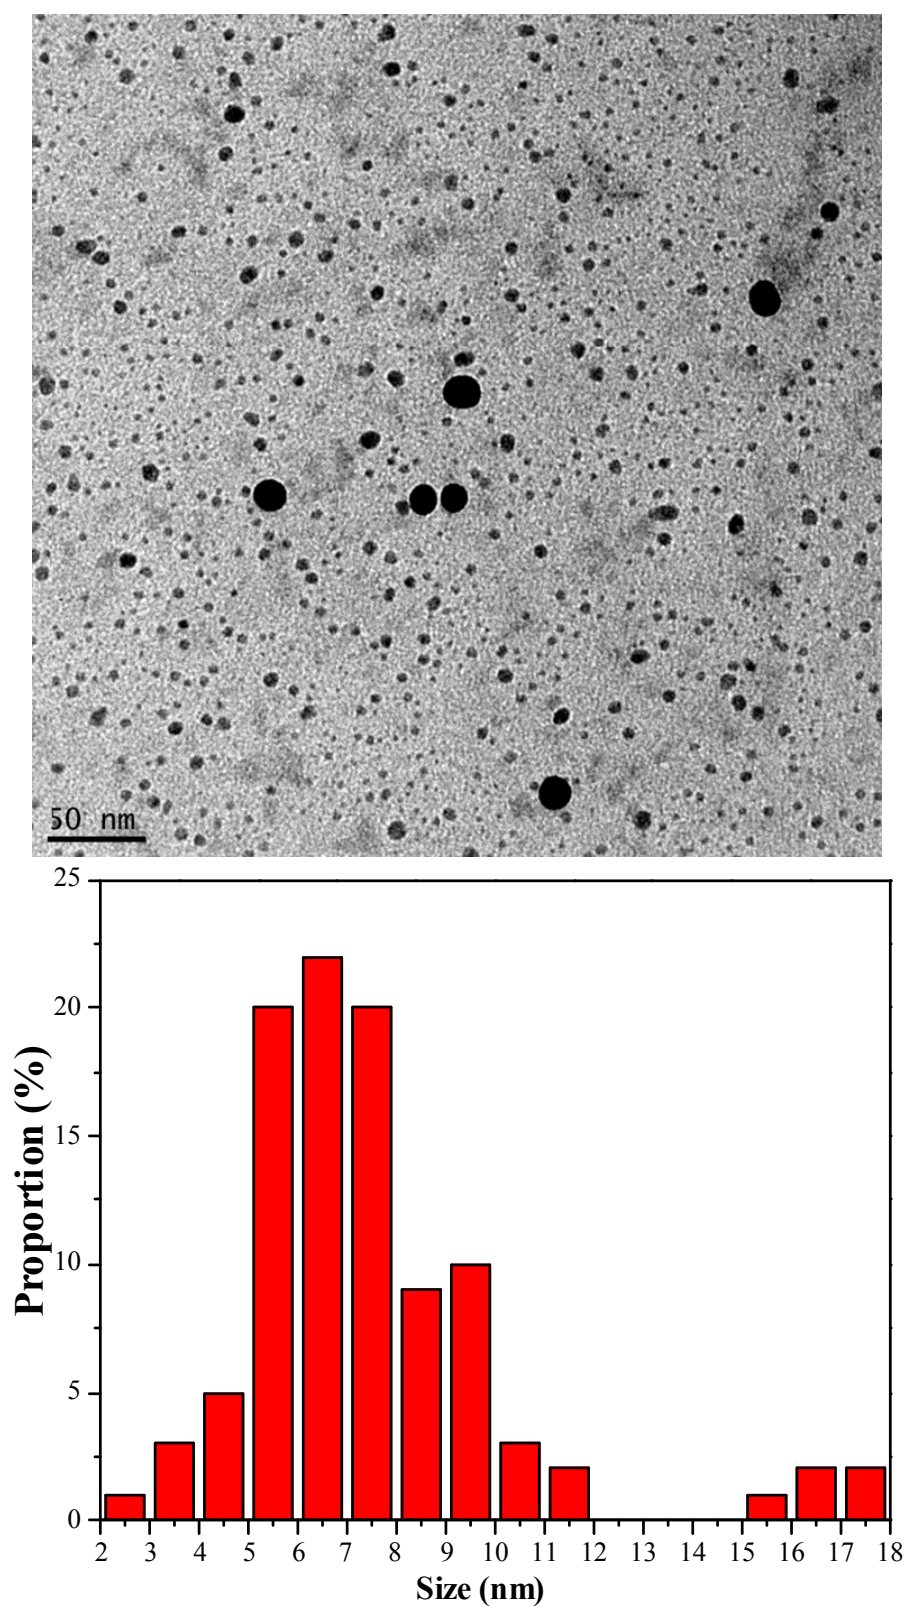



**Figure S6.** TEM image processing: from the raw images to the ones shown in Figure 1.

**(a) AuNPs— $1.7 \pm 0.3$  nm**

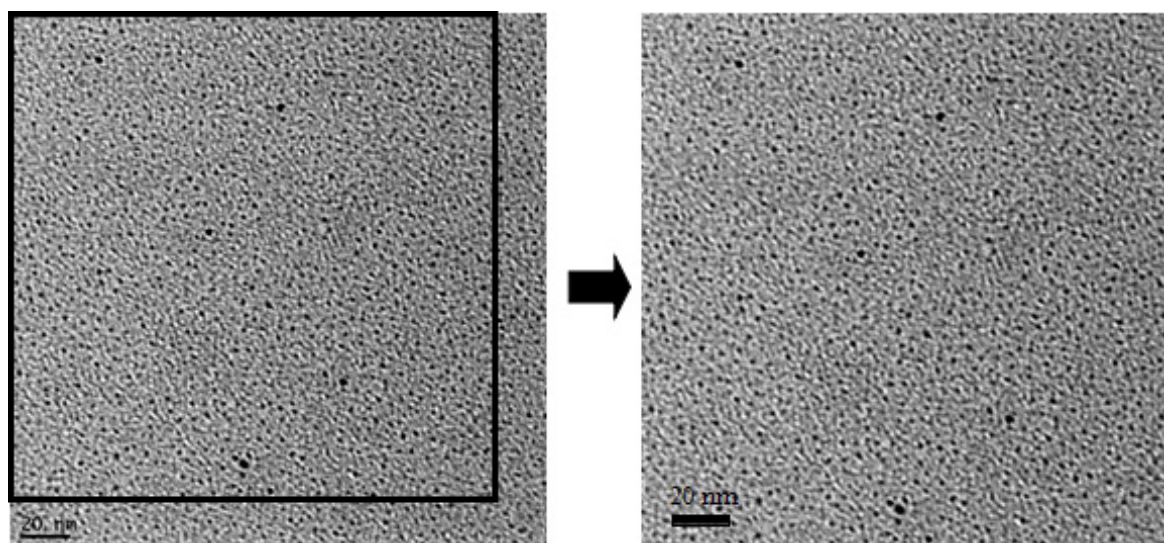

**(b) AuNPs— $3.4 \pm 0.7$  nm**

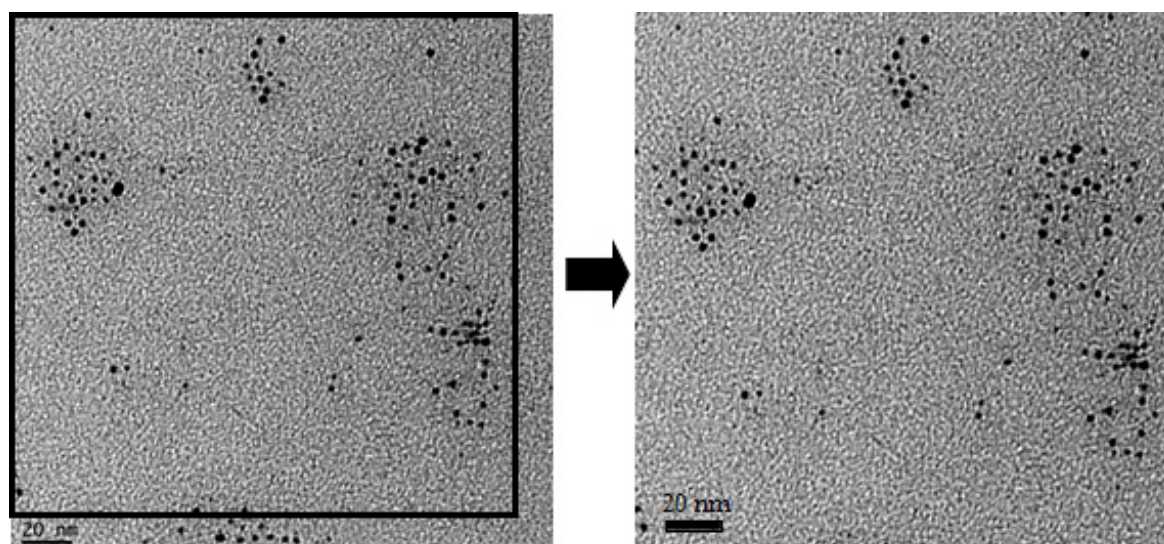

**(c) AuNPs— $5.7 \pm 0.7$  nm**

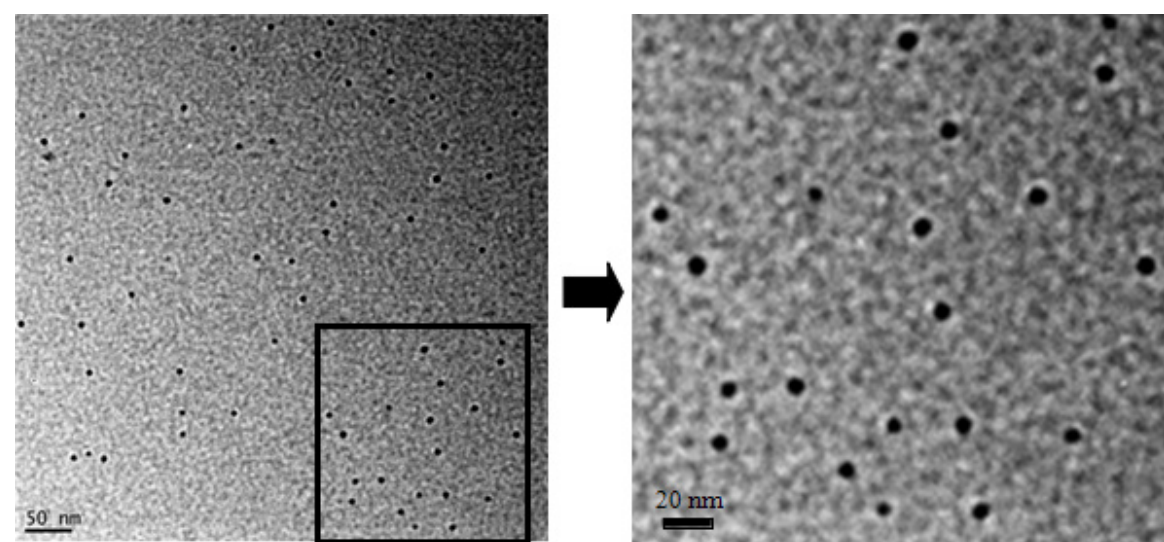

Figure S6. Cont.

(d) AuNPs (batch #1) —  $8.2 \pm 1.0$  nm

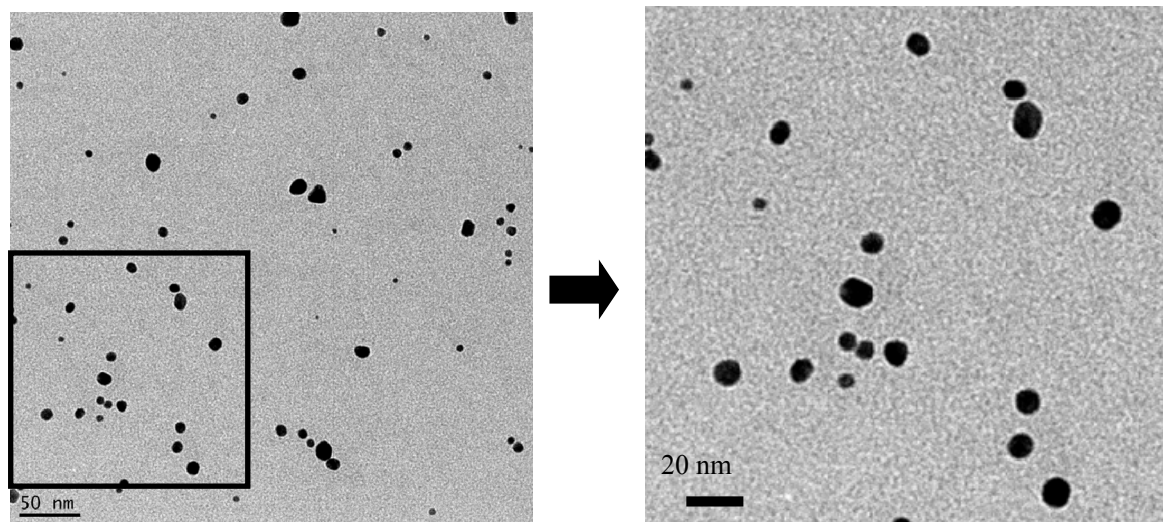

Supplement: molecules-18-12609-s001.pdf [file molecules-18-12609-s001.pdf]
